# Supplementary material for: Impact of treatment with TNF antagonists on total cholesterol in patients with ankylosing spondylitis and psoriatic arthritis
Source: Springer Nature journal article supplement (doi:10.1007/s10067-017-3537-5), 2017-01-20
Supplement: MOESM2 [file 12010576]

Table S2. Changes in Triglycerides in patients with Psoriatic arthritis

| **VARIABLE** | **TOTAL**  **(n=154)** | **TNF antagonists**  **(n=71)** | **Control group (n=83)** | p[[1]](#endnote-1) |
| --- | --- | --- | --- | --- |
| Baseline Triglycerides, mg/dL  median (interquartile range ) | 90.5 (62.0, 125.0) | 91.0 (60.0, 124.0) | 87.0 (65.0, 125.0) | 0.9870 |
| Triglycerides at 3 months, mg/dL median (interquartile range ) | 90.0 (69.0, 121.0) | 89.5 (68.0, 120.0) | 90.0 (69.0, 121.0) | 0.8584 |
| p[[2]](#endnote-2) | 0.6363 | 0.4158 | 0.9494 |  |
| Triglycerides at 6 months, mg/dL median (interquartile range ) | 95.5 (66.0, 123.0) | 86.5 (63.0, 116.0) | 105.5 (68.0, 133.0) | 0.1062 |
| p[[3]](#endnote-3) | 0.4669 | 0.4626 | 0.1300 |  |

1. p calculated between TNF antagonists and control group [↑](#endnote-ref-1)
2. p calculated between baseline triglycerides and triglycerides at 3 months [↑](#endnote-ref-2)
3. p calculated between baseline triglycerides and triglycerides at 6 months [↑](#endnote-ref-3)
